# Supplementary material for: Rare Genome-Wide Copy Number Variation and Expression of Schizophrenia in 22q11.2 Deletion Syndrome
Source: Atypon-hosted journal article supplement (doi:10.1176/appi.ajp.2017.16121417), 2017-07-28
Supplement: appi.ajp.2017.16121417.ds001.pdf [file appi.ajp.2017.16121417.ds001.pdf]

Data supplement for Bassett et al., Rare Genome-Wide Copy Number Variation and Expression of Schizophrenia in 22q11.2 Deletion Syndrome. Am J Psychiatry (doi:10.1176/appi.ajp.2017.16121417)

## SUPPLEMENTAL MATERIAL

### Rare genome-wide copy number variation and expression of schizophrenia in 22q11.2 deletion syndrome

Anne S. Bassett, M.D., Chelsea Lowther, B.Sc., Daniele Merico, Ph.D., Gregory Costain, M.D., Ph.D., Eva W. C. Chow, M.D., Therese van Amelsvoort, M.D., Ph.D., Donna McDonald-McGinn, M.Sc., Raquel E. Gur, M.D., Ph.D., Ann Swillen, Ph.D., Marianne Van den Bree, Ph.D., Kieran Murphy, M.D., Ph.D., Doron Gothelf, M.D., Carrie E. Bearden, Ph.D., Stephan Eliez, M.D., Wendy Kates, Ph.D., Nicole Philip, M.D., Vandana Sashi, M.D., Linda Campbell, Ph.D., Jacob Vorstman, M.D., Ph.D., Joseph Cubells, M.D., Ph.D., Gabriela M. Repetto, M.D., Tony Simon, Ph.D., Erik Boot, M.D., Ph.D., Tracy Heung, M.A., Rens Evers M.D., Ph.D., Claudia Vingerhoets, M.Sc., Esther van Duin, M.Sc., Elaine Zakai, M.D., Elfi Vergaelen, M.Sc., Koen Devriendt, M.D., Joris R. Vermeesch, Ph.D., Michael Owen, M.D., Ph.D., Clodagh Murphy, Ph.D., Elena Michaelovosky, Leila Kushan, M.Sc., Maude Schneider, M.Sc., Wanda Fremont, M.D., Tiffany Busa, M.D., Stephen Hooper, Ph.D., Kathryn McCabe, Ph.D., Sasja Duijff, Ph.D., Karin Isaev, B.Sc., Giovanna Pellicchia, Ph.D., John Wei, Ph.D., Matthew J. Gazzellone, M.Sc., Stephen W. Scherer, Ph.D., Beverly S. Emanuel, Ph.D., Tingwei Guo, Ph.D., Bernice E. Morrow, Ph.D., Christian R. Marshall, Ph.D., International 22q11.2DS Consortium on Brain and Behavior.

| <b>Supplemental Material</b>                                                                                                    | <b>Page</b>      |
|---------------------------------------------------------------------------------------------------------------------------------|------------------|
| Supplemental Methods                                                                                                            | 2-3              |
| Table S1. List of international sites participating in the International 22q11.2DS Brain and Behavior Consortium                | 4                |
| Table S2. Sources of 9,611 population-based controls used to adjudicate CNV rarity in the 22q11.2DS subjects                    | 5                |
| Table S3. List of 19 gene-sets included in rare CNV gene-set enrichment analysis                                                | 6                |
| Table S4. Additional genome-wide rare (<0.1%) CNV burden analyses in 22q11.2DS (n=329)                                          | 7                |
| Table S5. All rare CNVs (n=726) identified in n=291 of 329 subjects with 22q11.2DS                                              | Excel attachment |
| Table S6. Gene overlap between significant gene-sets for rare duplication CNVs in subjects with 22q11.2DS and schizophrenia     | 8-9              |
| Table S7. Connectivity analysis results for comparing 22q11.2 deletion region genes and schizophrenia-related duplication genes | 10               |
| Figure S1. Rare deletions overlapping the 22q11.2 deletion region in (n=329) 22q11.2DS cohort                                   | 11               |
| References                                                                                                                      | 12-13            |

## Supplemental Methods

In order to obtain an unrelated sample of individuals with a typical 22q11.2 deletion of consistent (European) ancestry, we used standard methods to estimate relatedness and ancestry. Genotypes from 272,834 unlinked single nucleotide polymorphisms (SNPs) from the 22q11.2DS subjects, together with genotype data from 778 HapMap subjects used as a reference for known ancestry, were clustered using the PLINK toolset.(1) The majority (n=692; 93.4%) of the 22q11.2DS samples were of European ancestry. Pair-wise identity by descent (IBD) was calculated for every pair of 22q11.2DS subjects. Pairs with a PI\_HAT value [defined as  $P(\text{IBD} = 2) + 0.5 \times P(\text{IBD} = 1)$ ]  $>0.3$  were classified as related. For the n=17 related pairs identified, we chose one sample per family, based on the best quality CNV and phenotypic data.

We generated a heatmap for the 22q11.2 deletion region based on the array intensity files using the Affymetrix Genotyping Console Software. We used these intensity data to select subjects with a “typical” 22q11.2 deletion, which comprise the most common deletion extents. Specifically, typical deletions were defined as low copy repeat (LCR) LCR-A-D deletions, or proximal nested LCR-A-B and LCR-A-C deletions, that would be detected using standard probes (e.g., TUPLE1 or N25) on a fluorescence *in situ* hybridization (FISH) analysis. We also ensured that key genes hypothesized to play a role in the phenotypic expression of 22q11.2DS were overlapped, including *DGCR8* (MIM: 609030), *COMT* (MIM:116760) and *TBX1* (MIM:602054).(2) In further data cleaning, we compared the heatmap results with available multiplex ligation-dependent probe amplification (MLPA) data, and also examined demographic and phenotypic data. We identified two samples with unresolved discrepancies in 22q11.2

deletion length, one with no 22q11.2 deletion, and six with discrepancies between phenotypic sex and observed genotype; these nine samples were excluded. Figure S1 shows the 22q11.2 deletion extent of subjects used in the current study.

**Table S1: List of international sites participating in the International Brain and Behavior Consortium on 22q11.2DS**

| Site                                        | Current study <sup>1</sup>                |                                               |
|---------------------------------------------|-------------------------------------------|-----------------------------------------------|
|                                             | Number of originating DNA samples (n=866) | Number of DNA samples in final cohort (n=329) |
| Toronto, ON, Canada                         | 118                                       | 97                                            |
| Maastricht, Netherlands                     | 65                                        | 59                                            |
| Philadelphia, PA, USA                       | 289                                       | 41                                            |
| Leuven, Belgium                             | 51                                        | 34                                            |
| Cardiff, UK/ London, UK/<br>Dublin, Ireland | 25                                        | 20                                            |
| Tel Aviv, Israel                            | 72                                        | 19                                            |
| Los Angeles, CA, USA                        | 38                                        | 17                                            |
| Geneva, Switzerland                         | 61                                        | 16                                            |
| Syracuse, NY, USA                           | 79                                        | 6                                             |
| Marseilles, France                          | 13                                        | 6                                             |
| Durham, NC, USA                             | 7                                         | 6                                             |
| Newcastle, Australia                        | 8                                         | 3                                             |
| Dublin, Ireland                             | 8                                         | 3                                             |
| Utrecht, Netherlands                        | 25                                        | 1                                             |
| Atlanta, GA, USA                            | 1                                         | 1                                             |
| Sacramento, CA, USA                         | 4                                         | -                                             |
| Santiago, Chile                             | 2                                         | -                                             |
| Rome, Italy                                 | -                                         | -                                             |
| Madrid, Spain                               | -                                         | -                                             |
| Mallorca, Spain                             | -                                         | -                                             |
| <b>Total</b>                                | <b>866</b>                                | <b>329</b>                                    |

<sup>1</sup>The current study required as a starting point the availability of Affymetrix 6.0 array data for potential copy number variation analysis, and subsequently DNA samples that passed all QC measures and met strict inclusion criteria. Thus, there are participating sites in the IBBC that have no data that could be included in the current study. The numbers also do not reflect the few subjects that were recruited at more than one site.

**Table S2: List of 9,611 population-based controls used to adjudicate CNV rarity in the 22q11.2DS subjects**

| <b>Control dataset</b>                                               | <b>Number of individuals</b> | <b>Array platform</b>   | <b>Description of dataset</b> |
|----------------------------------------------------------------------|------------------------------|-------------------------|-------------------------------|
| ONC (Ontario Familial Colorectal Cancer Registry)                    | 433                          | Illumina 1M             | Cotterchio et al. 2005(3)     |
| SAGE consortium controls                                             | 1,769                        | Illumina 1M             | Bierut et al. 2010(4)         |
| Health, Aging, and Body Composition (Health ABC) study controls      | 2,566                        | Illumina 1M Duo         | Coviello et al. 2012(5)       |
| POPGEN                                                               | 1,123                        | Affymetrix 6.0          | Krawczak et al. 2006(6)       |
| Ottawa Heart Institute controls                                      | 732                          | Affymetrix 6,0          | Stewart et al. 2009(7)        |
| Collaborative Genetic Study of Nicotine Dependence (COGEND) controls | 1,213                        | Illumina OMNI 2.5M Quad | Bierut et al. 2007(8)         |
| KORA controls                                                        | 1,775                        | Illumina OMNI 2.5M Quad | Verhoeven et al. 2013(9)      |
| <b>TOTAL</b>                                                         | <b>9,611</b>                 |                         |                               |

For our main analyses we used CNVs in the 22q11.2DS subjects that were found in <0.1% of the population controls described above (designated “rare”). All genomic coordinates are provided based on NCBI GRCh37, human genome build 19. Only “high-quality” CNVs were included in the study, defined as (i) identified by at least two of three CNV calling algorithms (iPattern, Birdsuite or Affymetrix Genotyping Console), (ii) spanning 10 consecutive array probes for either deletions or duplications, (iii) were  $\geq 10$  kb in size, and (iv) had <75% overlap with segmental duplications. We excluded CNVs likely to represent locus-specific batch effects (e.g., those with identical breakpoints that appeared in >1% of the sample). Larger CNVs that appeared to be fragmented were merged together and retained. We excluded all CNVs in the 22q11.2 deletion region and surrounding structurally complex region (2, 10), i.e., between genomic coordinates chr22:1-24,000,000 (NCBI Build 37/hg19). We also excluded all CNVs located on the sex chromosomes (11, 12).

**Table S3: List of 19 gene-sets included in rare CNV gene-set enrichment analysis**

| Gene-set Name                                      | Number of genes | Source                                  |
|----------------------------------------------------|-----------------|-----------------------------------------|
| <b>Human neuro-sets (n=7)</b>                      |                 |                                         |
| Neuronal Function Union Inclusive                  | 3,431           | Gene Ontology <sup>a</sup>              |
| Blue Module                                        | 2,484           | Uddin M et al. 2016(13)                 |
| Neuronal Function Union Stringent                  | 1,937           | Gene Ontology <sup>a</sup>              |
| Brain Specific Illumina Body Map 2.0               | 1,821           | Description below <sup>b</sup>          |
| Neuron Projection                                  | 1,720           | Gene Ontology <sup>a</sup>              |
| Targets of <i>FMRI</i>                             | 927             | Ascano M et al. 2012(14) <sup>a</sup>   |
| Synaptic                                           | 860             | Gene Ontology <sup>a</sup>              |
| <b>Mouse neuro-sets (n=3)</b>                      |                 |                                         |
| Neuro Union                                        | 3,764           | Mouse Genome Informatics <sup>c,a</sup> |
| Nervous System Phenotype                           | 2,609           | Mouse Genome Informatics <sup>c,a</sup> |
| Neurobehavioral Phenotype                          | 2,602           | Mouse Genome Informatics <sup>c,a</sup> |
| <b>Mouse, other body systems / lethality (n=8)</b> |                 |                                         |
| Hematological/Immune                               | 2,962           | Mouse Genome Informatics <sup>c,a</sup> |
| Cardiovascular/Muscle                              | 2,327           | Mouse Genome Informatics <sup>c,a</sup> |
| Endocrine/Exocrine/Reproduction                    | 2,298           | Mouse Genome Informatics <sup>c,a</sup> |
| Skeletal/Craniofacial/Limbs                        | 2,057           | Mouse Genome Informatics <sup>c,a</sup> |
| Integumentary/Adipose/Pigment                      | 1,950           | Mouse Genome Informatics <sup>c,a</sup> |
| Digestive/Hepatic                                  | 1,645           | Mouse Genome Informatics <sup>c,a</sup> |
| Sensory                                            | 1,601           | Mouse Genome Informatics <sup>c,a</sup> |
| Complete Lethality                                 | 1,145           | Mouse Genome Informatics <sup>c,a</sup> |
| <b>Mouse, <i>DGCR8</i>-related (n=1)</b>           |                 |                                         |
| <i>DGCR8</i> -related gene expression change       | 3,558           | Stark KL et al. 2008(15)                |

<sup>a</sup>Gene-sets used in Marshall CR, Howrigan DP, Merico D, et al. Nature Genetics(15), updated to November 2016 were retrieved from gene functional databases (e.g., Gene Ontology (GO), Mouse Genome Informatics (MGI)).

<sup>b</sup>Illumina Body Map 2.0 RNA-seq data were transformed into Rlog (x+1) scale. The log2 fold change was calculated by having the value of brain as the numerator and the average of other cell types as the denominator; genes having log2 fold change  $\geq 1$  were selected as brain-specific.

<sup>c</sup>Retrieved from <http://www.informatics.jax.org/>

**Table S4: Additional genome-wide rare (<0.1%) CNV burden analyses in 22q11.2DS (n=329)**

|                                                    |                                    | Schizophrenia<br>(n=158) |      | Non-Psychotic<br>(n=171) |      | Analysis <sup>b</sup> |
|----------------------------------------------------|------------------------------------|--------------------------|------|--------------------------|------|-----------------------|
|                                                    |                                    | n                        | %    | n                        | %    | p                     |
| <b>All Rare (0.1%)<br/>CNVs</b>                    | Loss or Gain                       | 142                      | 89.9 | 149                      | 87.1 | 0.4921                |
|                                                    | Exonic (loss or gain) <sup>d</sup> | 92                       | 58.2 | 90                       | 52.6 | 0.3198                |
|                                                    | Exonic Loss <sup>d</sup>           | 38                       | 24.1 | 47                       | 27.5 | 0.5291                |
|                                                    | Exonic Gain <sup>d</sup>           | 68                       | 43.0 | 59                       | 34.5 | 0.1146                |
| <b>Large (&gt;500 kb)<br/>rare (0.1%)<br/>CNVs</b> | Loss or Gain                       | 22                       | 13.9 | 18                       | 10.5 | 0.3999                |
|                                                    | Exonic (loss or gain) <sup>d</sup> | 16                       | 10.1 | 15                       | 8.8  | 0.7089                |
|                                                    | Exonic Loss <sup>d</sup>           | 4                        | 2.5  | 6                        | 3.5  | 0.7521                |
|                                                    | Exonic Gain <sup>d</sup>           | 12                       | 7.6  | 9                        | 5.3  | 0.4994                |
| <b>Rare CNV (0.1%)<br/>overlapping<br/>miRNA</b>   | Loss or Gain                       | 16                       | 10.1 | 8                        | 4.7  | 0.0878                |
|                                                    | Loss                               | 6                        | 3.8  | 3                        | 1.8  | 0.3210                |
|                                                    | Gain                               | 10                       | 6.3  | 6                        | 3.5  | 0.3068                |
| <b>Very rare<sup>c</sup> CNVs</b>                  | Loss or Gain                       | 108                      | 68.4 | 125                      | 73.1 | 0.3957                |
|                                                    | Exonic (loss or gain) <sup>d</sup> | 67                       | 42.4 | 65                       | 38.0 | 0.4325                |
|                                                    | Exonic Loss <sup>d</sup>           | 26                       | 16.5 | 32                       | 18.7 | 0.6646                |
|                                                    | Exonic Gain <sup>d</sup>           | 47                       | 29.7 | 39                       | 22.8 | 0.1682                |

<sup>a</sup>Rare autosomal CNVs >10 kb and <6.5 Mb, genome-wide, outside of the 22q11.2 deletion region; see text for details

<sup>b</sup>Fisher's Exact Test, two-sided

<sup>c</sup>Very rare CNVs are defined as those that did not overlap any of the CNVs found in 9,611 population-based controls

<sup>d</sup>Exonic CNVs are defined as those that overlapped at least one bp of coding sequence.

**Table S6: Gene overlap between significant gene-sets for rare duplication CNVs in subjects with 22q11.2DS and schizophrenia**

| Mouse Nervous System | Count | Mouse Neurobehavioral | Count | Mouse Neural Union     | Count | Mouse Muscle/Cardio    | Count | Mouse Endocrine | Count | GO Synaptic | Count |
|----------------------|-------|-----------------------|-------|------------------------|-------|------------------------|-------|-----------------|-------|-------------|-------|
| ABCA4                | 1     |                       |       | ABCA4                  | 1     |                        |       |                 |       |             |       |
| HSD11B1              | 1     | HSD11B1               | 1     | HSD11B1                | 1     |                        |       | HSD11B1         | 1     |             |       |
| RYR2                 | 1     | RYR2                  | 1     | RYR2                   | 1     | RYR2                   | 1     | RYR2            | 1     |             |       |
| XRCC5                | 1     | XRCC5                 | 1     | XRCC5                  | 1     |                        |       | XRCC5           | 1     |             |       |
| GRM7                 | 1     | GRM7                  | 1     | GRM7                   | 1     |                        |       |                 |       | GRM7        | 1     |
| SCN11A,SCN5A,SCN10A  | 3     | SCN11A,SCN5A,SCN10A   | 3     | SCN11A,SCN5A,SCN10A    | 3     | SCN5A,SCN10A           | 2     |                 |       |             |       |
| APOD                 | 1     | APOD                  | 1     | APOD                   | 1     | APOD                   | 1     |                 |       |             |       |
| DOK7                 | 1     | DOK7                  | 1     | DOK7                   | 1     | DOK7                   | 1     |                 |       | DOK7        | 1     |
| CCKAR                | 1     | CCKAR                 | 1     | CCKAR                  | 1     |                        |       | CCKAR           | 1     | CCKAR       | 1     |
| TLR3                 | 1     | TLR3                  | 1     | TLR3                   | 1     | TLR3                   | 1     | TLR3            | 1     |             |       |
| KHDRBS2              | 1     |                       |       | KHDRBS2                | 1     |                        |       |                 |       |             |       |
| PARK2                | 1     | PARK2                 | 1     | PARK2                  | 1     | PARK2                  | 1     |                 |       | PARK2       | 1     |
| MLLT4                | 1     |                       |       | MLLT4                  | 1     | MLLT4                  | 1     |                 |       |             |       |
| ETV1                 | 1     | ETV1                  | 1     | ETV1                   | 1     | ETV1                   | 1     |                 |       |             |       |
| CACNA2D1             | 1     | CACNA2D1              | 1     | CACNA2D1               | 1     | CACNA2D1               | 1     |                 |       |             |       |
| TDRP                 | 1     |                       |       | TDRP                   | 1     |                        |       | TDRP            | 1     |             |       |
| DLC1                 | 1     |                       |       | DLC1                   | 1     | DLC1                   | 1     |                 |       |             |       |
| UNC5D                | 1     |                       |       | UNC5D                  | 1     |                        |       |                 |       |             |       |
| LYN                  | 1     |                       |       | LYN                    | 1     |                        |       |                 |       | LYN         | 1     |
| SYK                  | 1     |                       |       | SYK                    | 1     | SYK                    | 1     | SYK             | 1     |             |       |
| PTEN                 | 1     | PTEN                  | 1     | PTEN                   | 1     | PTEN                   | 1     | PTEN            | 1     | PTEN        | 1     |
| PI4K2A               | 1     | PI4K2A                | 1     | PI4K2A                 | 1     |                        |       | PI4K2A          | 1     | PI4K2A      | 1     |
| MYO7A,OMP            | 1     | MYO7A,CAPN5           | 2     | MYO7A,OMP,CAPN5        | 3     | B3GNT6                 | 1     | MYO7A,B3GNT6    | 2     | MYO7A       | 1     |
| CADM1                | 1     |                       |       | CADM1                  | 1     |                        |       | CADM1           | 1     | CADM1       | 1     |
| FBXW8                | 1     | FBXW8                 | 1     | FBXW8                  | 1     | FBXW8                  | 1     |                 |       |             |       |
| C1QTNF9B,TNFRSF19    | 2     | C1QTNF9B,SGCG         | 2     | C1QTNF9B,TNFRSF19,SGCG | 3     | C1QTNF9B,TNFRSF19,SGCG | 3     | C1QTNF9B        | 1     |             |       |
| RPS6KA5              | 1     | RPS6KA5               | 1     | RPS6KA5                | 1     |                        |       |                 |       |             |       |
| CHRNA7,TRPM1         | 2     | CHRNA7,TRPM1          | 2     | CHRNA7,TRPM1           | 2     |                        |       | CHRNA7,KLF13    | 2     | CHRNA7      | 1     |
| CHRNA7,TRPM1         | -     | CHRNA7,TRPM1          | -     | CHRNA7,TRPM1           | -     |                        |       | CHRNA7,KLF13    | -     | CHRNA7      | -     |
| CIB2                 | 1     | CIB2                  | 1     | CIB2                   | 1     | CIB2                   | 1     |                 |       | CIB2        | 1     |
| SPG7                 | 1     | SPG7                  | 1     | SPG7                   | 1     |                        |       |                 |       |             |       |
| LHX1                 | 1     | GGNBP2                | 1     | LHX1,GGNBP2            | 2     | LHX1                   | 1     | LHX1            | 1     |             |       |
| MBP                  | 1     | MBP                   | 1     | MBP                    | 1     |                        |       |                 |       |             |       |
| SLC23A2              | 1     |                       |       | SLC23A2                | 1     | SLC23A2                | 1     | SLC23A2         | 1     |             |       |
| VSX1                 | 1     |                       |       | VSX1                   | 1     |                        |       |                 |       |             |       |



| Mouse Nervous System      | Count     | Mouse Neurobehavioral | Count     | Mouse Neural Union        | Count     | Mouse Muscle/Cardio | Count     | Mouse Endocrine | Count     | GO Synaptic | Count     |
|---------------------------|-----------|-----------------------|-----------|---------------------------|-----------|---------------------|-----------|-----------------|-----------|-------------|-----------|
| DSCAM                     | 1         | DSCAM                 | 1         | DSCAM                     | 1         | DSCAM               | 1         | DSCAM           | 1         | DSCAM       | 1         |
| ADORA2A,MIF, SMARCB1      | 3         | ADORA2A,GGT1          | 2         | ADORA2A,MIF, SMARCB1,GGT1 | 4         | ADORA2A,MMP11       | 2         | SMARCB1,GGT1    | 2         |             |           |
|                           |           | ASL                   | 1         | ASL                       | 1         | ASL                 | 1         | ASL             | 1         |             |           |
|                           |           | ROCK1                 | 1         | ROCK1                     | 1         | ROCK1               | 1         |                 |           |             |           |
|                           |           | VWA8                  | 1         | VWA8                      | 1         | VWA8                | 1         |                 |           |             |           |
|                           |           | ELMO1                 | 1         | ELMO1                     | 1         |                     |           | ELMO1           | 1         |             |           |
|                           |           | NAT2                  | 1         | NAT2                      | 1         |                     |           | NAT2            | 1         |             |           |
|                           |           | SYT10                 | 1         | SYT10                     | 1         |                     |           |                 |           | SYT10       | 1         |
|                           |           | AHRR                  | 1         | AHRR                      | 1         |                     |           |                 |           |             |           |
|                           |           | DNAJC15               | 1         | DNAJC15                   | 1         |                     |           |                 |           |             |           |
|                           |           | CRBN                  | 1         | CRBN                      | 1         |                     |           |                 |           |             |           |
|                           |           | DGAT2                 | 1         | DGAT2                     | 1         |                     |           |                 |           |             |           |
|                           |           | PDE4DIP               | 1         | PDE4DIP                   | 1         |                     |           |                 |           |             |           |
|                           |           |                       |           |                           |           | SLC9A3              | 1         | SLC9A3          | 1         |             |           |
|                           |           |                       |           |                           |           | ARL4D               | 1         | RANBP9          | 1         | SLIT1       | 1         |
|                           |           |                       |           |                           |           | ARHGAP42            | 1         | BTRC            | 1         |             |           |
|                           |           |                       |           |                           |           | UVRAG               | 1         | WDR48           | 1         |             |           |
|                           |           |                       |           |                           |           |                     |           | BLK             | 1         |             |           |
|                           |           |                       |           |                           |           |                     |           | IMMP2L          | 1         |             |           |
|                           |           |                       |           |                           |           |                     |           | AGR2            | 1         |             |           |
|                           |           |                       |           |                           |           |                     |           | THRSP           | 1         |             |           |
|                           |           |                       |           |                           |           |                     |           | ALPPL2          | 1         |             |           |
|                           |           |                       |           |                           |           |                     |           | ALPPL2          | -         |             |           |
| <b>Total unique genes</b> | <b>42</b> |                       | <b>42</b> |                           | <b>58</b> |                     | <b>31</b> |                 | <b>32</b> |             | <b>14</b> |

Red font indicates genes included in the Mouse Nervous System Phenotype gene-set, ordered as in Table 3 then by the number of gene-sets in which the gene appears; Count = unique genes within the gene-set, with “-” indicating a CNV overlapping the same gene(s) in another subject, thus repeated genes within a gene-set.

**Table S7. Table S7. Connectivity analysis results for comparing 22q11.2 deletion region genes and schizophrenia-related duplication genes**

| gene_symbol | Entrez_Id | avScoresCS  | empPvalueScoreCS   | FDRScoreCS  |
|-------------|-----------|-------------|--------------------|-------------|
| P2RX6       | 9127      | 0.008496535 | <b>0.003286148</b> | 0.151162791 |
| SEPT5       | 5413      | 0.003328688 | <b>0.014282103</b> | 0.19622093  |
| RTN4R       | 65078     | 0.003106461 | <b>0.015925177</b> | 0.19622093  |
| CLTCL1      | 8218      | 0.002875936 | <b>0.01706269</b>  | 0.19622093  |
| CRKL        | 1399      | 0.001201171 | <b>0.033872599</b> | 0.276162791 |
| PI4KA       | 5297      | 0.001101492 | <b>0.036021234</b> | 0.276162791 |
| SLC25A1     | 6576      | 0.000364188 | 0.06028817         | 0.396179402 |
| GP1BB       | 2812      | 1.88E-05    | 0.154764914        | 0.889898256 |
| CDC45       | 8318      | 1.37E-05    | 0.188195147        | 0.961886305 |
| CLDN5       | 7122      | 1.07E-05    | 0.216822548        | 0.997383721 |
| DGCR8       | 54487     | 8.04E-06    | 0.252022245        | 1           |
| UFD1L       | 7353      | 6.31E-06    | 0.281850354        | 1           |
| COMT        | 1312      | 5.07E-06    | 0.307381193        | 1           |
| TRMT2A      | 27037     | 4.42E-06    | 0.324317492        | 1           |
| TBX1        | 6899      | 3.66E-06    | 0.346309403        | 1           |
| KLHL22      | 84861     | 2.94E-06    | 0.367542973        | 1           |
| ZNF74       | 7625      | 1.82E-06    | 0.409567745        | 1           |
| MRPL40      | 64976     | 1.17E-06    | 0.463978766        | 1           |
| SCARF2      | 91179     | 1.02E-06    | 0.475606673        | 1           |
| TSSK2       | 23617     | 7.67E-07    | 0.496524267        | 1           |
| GNB1L       | 54584     | 7.40E-07    | 0.499368049        | 1           |
| ZDHHC8      | 29801     | 6.13E-07    | 0.516936299        | 1           |
| DGCR6L      | 85359     | 3.51E-07    | 0.565596562        | 1           |
| DGCR6       | 8214      | 2.82E-07    | 0.584934277        | 1           |
| AIFM3       | 150209    | 2.82E-07    | 0.586830131        | 1           |
| TANGO2      | 128989    | 1.97E-07    | 0.596498989        | 1           |
| GSC2        | 2928      | 3.13E-08    | 0.632520222        | 1           |
| USP41       | 373856    | 9.57E-09    | 0.644021739        | 1           |
| PRODH       | 5625      | 0           | 1                  | 1           |
| DGCR2       | 9993      | 0           | 1                  | 1           |
| DGCR14      | 8220      | 0           | 1                  | 1           |
| HIRA        | 7290      | 0           | 1                  | 1           |
| C22orf39    | 128977    | 0           | 1                  | 1           |
| TXNRD2      | 10587     | 0           | 1                  | 1           |
| ARVCF       | 421       | 0           | 1                  | 1           |
| RANBP1      | 5902      | 0           | 1                  | 1           |
| MED15       | 51586     | 0           | 1                  | 1           |
| SERPIND1    | 3053      | 0           | 1                  | 1           |
| SNAP29      | 9342      | 0           | 1                  | 1           |
| LZTR1       | 8216      | 0           | 1                  | 1           |
| THAP7       | 80764     | 0           | 1                  | 1           |
| SLC7A4      | 6545      | 0           | 1                  | 1           |

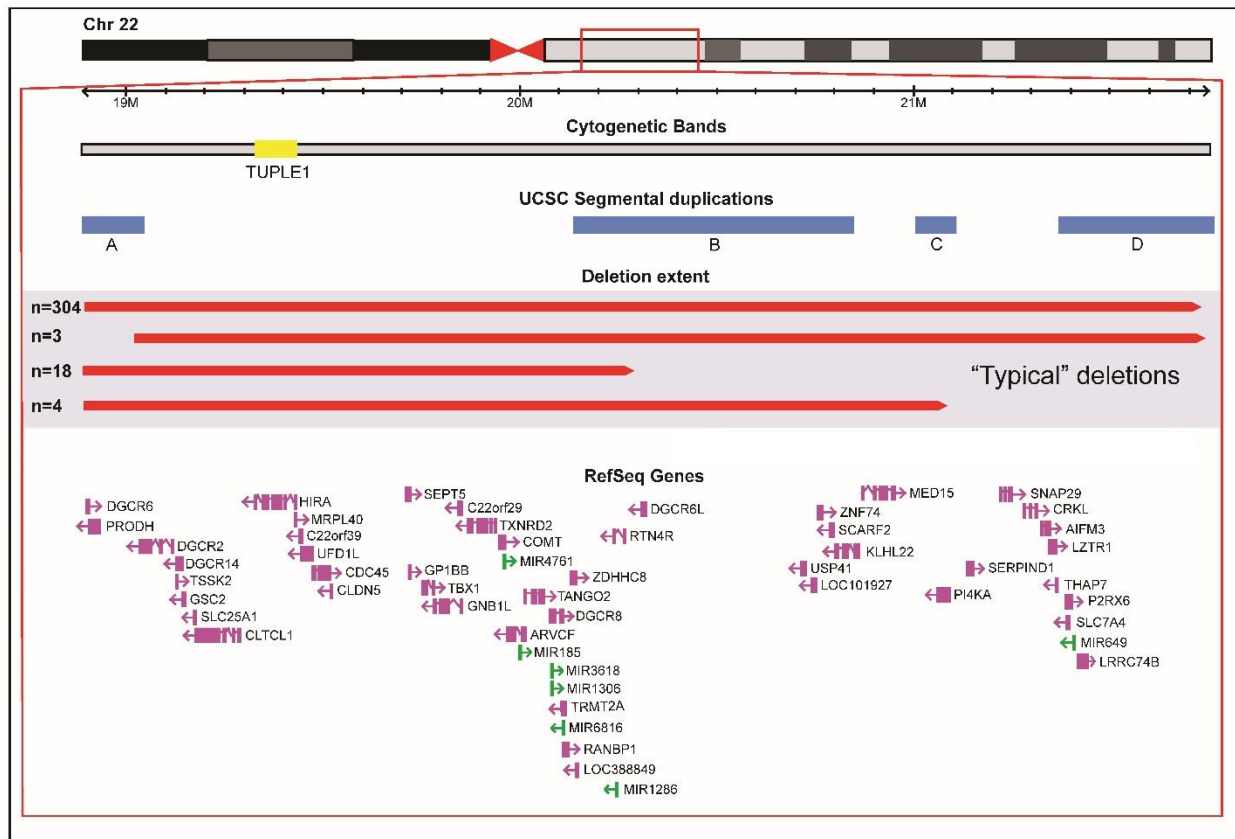

**Figure S1. Rare deletions overlapping the 22q11.2 deletion region in 329 cases**

The four segmental duplications (A-D) across the 22q11.2 deletion region are shown in blue. The 22q11.2 deletion coordinates estimated from heatmap data for the n=329 22q11.2DS cases included in the study are represented by red bars for 22q11.2 deletions considered “typical”, see manuscript for details. All 46 protein-coding genes (pink) and seven microRNAs (green) located within the 22q11.2 deletion syndrome region are shown; 37 other non-coding genes and splice variants of the 46 protein-coding genes are not shown. The approximate position of the 22q11.2 deletion syndrome fluorescence *in situ* hybridization probe, TUPLE1, is shown in yellow along the cytogetic band. The image was modified from the Database of Genomic variants (<http://dgv.tcag.ca>), NCBI Build 37 (hg 19).

**REFERENCES**

1. Purcell S, Neale B, Todd-Brown K, Thomas L, Ferreira MA, Bender D, Maller J, Sklar P, de Bakker PI, Daly MJ, Sham PC. PLINK: a tool set for whole-genome association and population-based linkage analyses. *Am J Hum Genet.* 2007;81:559-575.
2. McDonald-McGinn DM, Sullivan KE, Marino B, Philip N, Swillen A, Vorstman JAS, Zackai EH, Emanuel BS, Vermeesch JR, Morrow BE, Scambler PJ, Bassett AS. 22q11.2 deletion syndrome. *Nat Rev Dis Prim.* 2015:15071.
3. Cotterchio M, Manno M, Klar N, McLaughlin J, Gallinger S. Colorectal screening is associated with reduced colorectal cancer risk: a case-control study within the population-based Ontario Familial Colorectal Cancer Registry. *Cancer Causes Control.* 2005;16:865-875.
4. Bierut LJ, Agrawal A, Bucholz KK, Doheny KF, Laurie C, Pugh E, Fisher S, Fox L, Howells W, Bertelsen S, Hinrichs AL, Almasy L, Breslau N, Culverhouse RC, Dick DM, Edenberg HJ, Foroud T, Gruzza RA, Hatsukami D, Hesselbrock V, Johnson EO, Kramer J, Krueger RF, Kuperman S, Lynskey M, Mann K, Neuman RJ, Nothen MM, Nurnberger JI, Jr., Porjesz B, Ridinger M, Saccone NL, Saccone SF, Schuckit MA, Tischfield JA, Wang JC, Rietschel M, Goate AM, Rice JP, Gene EASC. A genome-wide association study of alcohol dependence. *Proc Natl Acad Sci U S A.* 2010;107:5082-5087.
5. Coviello AD, Haring R, Wellons M, Vaidya D, Lehtimäki T, Keildson S, Lunetta KL, He C, Fornage M, Lagou V, Mangino M, Onland-Moret NC, Chen B, Eriksson J, Garcia M, Liu YM, Koster A, Lohman K, Lyytikäinen LP, Petersen AK, Prescott J, Stolk L, Vandenput L, Wood AR, Zhuang WV, Ruukonen A, Hartikainen AL, Pouta A, Bandinelli S, Biffar R, Brabant G, Cox DG, Chen Y, Cummings S, Ferrucci L, Gunter MJ, Hankinson SE, Martikainen H, Hofman A, Homuth G, Illig T, Jansson JO, Johnson AD, Karasik D, Karlsson M, Kettunen J, Kiel DP, Kraft P, Liu J, Ljunggren O, Lorentzon M, Maggio M, Markus MR, Mellstrom D, Miljkovic I, Mirel D, Nelson S, Morin Papunen L, Peeters PH, Prokopenko I, Raffel L, Reincke M, Reiner AP, Rexrode K, Rivadeneira F, Schwartz SM, Siscovick D, Soranzo N, Stockl D, Tworoger S, Uitterlinden AG, van Gils CH, Vasani RS, Wichmann HE, Zhai G, Bhasin S, Bidlingmaier M, Chanock SJ, De Vivo I, Harris TB, Hunter DJ, Kahonen M, Liu S, Ouyang P, Spector TD, van der Schouw YT, Viikari J, Wallaschofski H, McCarthy MI, Frayling TM, Murray A, Franks S, Jarvelin MR, de Jong FH, Raitakari O, Teumer A, Ohlsson C, Murabito JM, Perry JR. A genome-wide association meta-analysis of circulating sex hormone-binding globulin reveals multiple Loci implicated in sex steroid hormone regulation. *PLoS Genet.* 2012;8:e1002805.
6. Krawczak M, Nikolaus S, von Eberstein H, Croucher PJ, El Mokhtari NE, Schreiber S. PopGen: population-based recruitment of patients and controls for the analysis of complex genotype-phenotype relationships. *Community genetics.* 2006;9:55-61.
7. Stewart AF, Dandona S, Chen L, Assogba O, Belanger M, Ewart G, LaRose R, Doelle H, Williams K, Wells GA, McPherson R, Roberts R. Kinesin family member 6 variant Trp719Arg does not associate with angiographically defined coronary artery disease in the Ottawa Heart Genomics Study. *J Am Coll Cardiol.* 2009;53:1471-1472.
8. Bierut LJ, Madden PA, Breslau N, Johnson EO, Hatsukami D, Pomerleau OF, Swan GE, Rutter J, Bertelsen S, Fox L, Fugman D, Goate AM, Hinrichs AL, Konvicka K, Martin NG, Montgomery GW, Saccone NL, Saccone SF, Wang JC, Chase GA, Rice JP, Ballinger DG. Novel genes identified in a high-density genome wide association study for nicotine dependence. *Hum Mol Genet.* 2007;16:24-35.

9. Verhoeven VJ, Hysi PG, Wojciechowski R, Fan Q, Guggenheim JA, Hohn R, MacGregor S, Hewitt AW, Nag A, Cheng CY, Yonova-Doing E, Zhou X, Ikram MK, Buitendijk GH, McMahon G, Kemp JP, Pourcain BS, Simpson CL, Makela KM, Lehtimaki T, Kahonen M, Paterson AD, Hosseini SM, Wong HS, Xu L, Jonas JB, Parssinen O, Wedenoja J, Yip SP, Ho DW, Pang CP, Chen LJ, Burdon KP, Craig JE, Klein BE, Klein R, Haller T, Metspalu A, Khor CC, Tai ES, Aung T, Vithana E, Tay WT, Barathi VA, Consortium for Refractive E, Myopia, Chen P, Li R, Liao J, Zheng Y, Ong RT, Doring A, Diabetes C, Complications Trial/Epidemiology of Diabetes I, Complications Research G, Evans DM, Timpson NJ, Verkerk AJ, Meitinger T, Raitakari O, Hawthorne F, Spector TD, Karssen LC, Pirastu M, Murgia F, Ang W, Wellcome Trust Case Control C, Mishra A, Montgomery GW, Pennell CE, Cumberland PM, Cotlarciuc I, Mitchell P, Wang JJ, Schache M, Janmahasatian S, Igo RP, Jr., Lass JH, Chew E, Iyengar SK, Fuchs' Genetics Multi-Center Study G, Gorgels TG, Rudan I, Hayward C, Wright AF, Polasek O, Vataavuk Z, Wilson JF, Fleck B, Zeller T, Mirshahi A, Muller C, Uitterlinden AG, Rivadeneira F, Vingerling JR, Hofman A, Oostra BA, Amin N, Bergen AA, Teo YY, Rahi JS, Vitart V, Williams C, Baird PN, Wong TY, Oexle K, Pfeiffer N, Mackey DA, Young TL, van Duijn CM, Saw SM, Bailey-Wilson JE, Stambolian D, Klaver CC, Hammond CJ. Genome-wide meta-analyses of multiethnic cohorts identify multiple new susceptibility loci for refractive error and myopia. *Nat Genet.* 2013;45:314-318.
10. Bassett AS, Marshall CR, Lionel AC, Chow EW, Scherer SW. Copy number variations and risk for schizophrenia in 22q11.2 deletion syndrome. *Hum Mol Genet.* 2008;17:4045-4053.
11. Costain G, Lionel A, Merico D, Forsythe P, Russell K, Lowther C, Yuen T, Husted J, Stavropoulos D, Speevak M, Chow EW, Marshall CR, Scherer SW, Bassett AS. Pathogenic rare copy number variants in community-based schizophrenia suggest a potential role for clinical microarrays. *Hum Mol Genet.* 2013;22:4485-4501.
12. Silversides CK, Lionel AC, Costain G, Merico D, Migita O, Liu B, Yuen T, Rickaby J, Thiruvahindrapuram B, Marshall CR, Scherer SW, Bassett AS. Rare copy number variations in adults with tetralogy of Fallot implicate novel risk gene pathways. *PLoS Genetics.* 2012;8:e1002843.
13. Uddin M, Pellecchia G, Thiruvahindrapuram B, D'Abate L, Merico D, Chan A, Zarrei M, Tammimies K, Walker S, Gazzellone MJ, Nalpathamkalam T, Yuen RK, Devriendt K, Mathonnet G, Lemyre E, Nizard S, Shago M, Joseph-George AM, Noor A, Carter MT, Yoon G, Kannu P, Tihy F, Thorland EC, Marshall CR, Buchanan JA, Speevak M, Stavropoulos DJ, Scherer SW. Indexing Effects of Copy Number Variation on Genes Involved in Developmental Delay. *Sci Rep.* 2016;6:28663.
14. Ascano M, Jr., Mukherjee N, Bandaru P, Miller JB, Nusbaum JD, Corcoran DL, Langlois C, Munschauer M, Dewell S, Hafner M, Williams Z, Ohler U, Tuschl T. FMRP targets distinct mRNA sequence elements to regulate protein expression. *Nature.* 2012;492:382-386.
15. Stark KL, Xu B, Bagchi A, Lai WS, Liu H, Hsu R, Wan X, Pavlidis P, Mills AA, Karayiorgou M, Gogos JA. Altered brain microRNA biogenesis contributes to phenotypic deficits in a 22q11-deletion mouse model. *Nat Genet.* 2008;40:751-760.
